## Visual search for upright bigrams predicts reading fluency in children

Aakash Agrawal<sup>1</sup>, Sonali Nag<sup>4</sup>, K.V.S. Hari<sup>2</sup> & S. P. Arun<sup>3\*</sup>

<sup>1</sup>Centre for BioSystems Science & Engineering, <sup>2</sup>Department of Electrical Communication Engineering & <sup>3</sup>Centre for Neuroscience  
Indian Institute of Science, Bangalore, 560012, India

<sup>4</sup>University of Oxford & The Promise Foundation

\*Correspondence to: S. P. Arun ([sparun@iisc.ac.in](mailto:sparun@iisc.ac.in))

1  
2  
3  
4  
5  
6  
7  
8  
9  
10  
11  
12  
13  
14  
15  
16  
17

## ABSTRACT

Fluent reading is an important milestone in education, but we lack a clear understanding of why children vary so widely in attaining this milestone. Language-related factors such as rapid automatized naming (RAN) and phonological awareness have been identified as important factors that influence reading fluency. Of theoretical interest is also, however, whether aspects of visual processing influence reading fluency. To investigate this issue, we tested primary school children ( $n = 68$ ) on four tasks: two reading fluency tasks (word reading and passage reading), a RAN task to measure naming speed, and a visual search task using letters and bigrams to measure visual processing. As expected, the RAN score was strongly correlated with reading fluency. In addition, visual processing of bigrams was correlated with reading fluency. Importantly, this association was specific to upright but not inverted bigrams, and to bigrams with normal but not large letter spacing. Thus, reading fluency in children is accompanied by specialized changes in upright bigram processing. We propose that bigram processing during visual search could complement existing measures of language processing to understand individual differences in reading fluency.

18

## INTRODUCTION

19            Learning to read fluently is an important milestone during development, but  
20 there is considerable individual variation in attainment. For alphabetic languages, this  
21 variation has been explained using two simpler cognitive tasks: phoneme awareness  
22 (PA, which measures the ability to manipulate phonemes in a word), and rapid  
23 automatized naming (RAN, which measures the speed of naming visually presented  
24 letters or objects) (Melby-Lervåg et al., 2012; Norton and Wolf, 2012). These abilities  
25 not only explain concurrent individual variation in reading fluency (Melby-Lervåg et al.,  
26 2012; Norton and Wolf, 2012), but also its longitudinal development (Parrila et al.,  
27 2004; Lervåg and Hulme, 2009; Landerl et al., 2018; Vander Stappen and Reybroeck,  
28 2018).

29            The RAN measure has been hypothesized to capture efficiency in cross-modal  
30 print processing (Nag and Snowling, 2012). Other explanations for the robust RAN-  
31 reading association range from domain-general speed of processing (Kail et al., 1999),  
32 especially serial processing (Sideridis et al., 2016), to domain-specific speed to  
33 retrieve phonological codes, discriminate component visual features (Stainthorp et al.,  
34 2010) and recognize whole visual items (Lervåg and Hulme, 2009). Thus, RAN  
35 captures component processes that are both perceptual-lexical as well as attentional  
36 and memory-based (Sideridis et al., 2016).

37            Given that reading begins with vision, it stands to reason that fluent reading is  
38 associated with changes in visual processing as well as in phonological or naming  
39 abilities. However, most previous work has focused on attentional deficits, particularly  
40 with respect to reading difficulties. Dyslexia is associated with a range of processing  
41 deficits in visuospatial attention (Goswami, 2015), crowding (Bouma and Legein, 1977;  
42 Martelli et al., 2009; Zorzi et al., 2012), attention span (Bosse et al., 2007), change

43 detection (Rima et al., 2020) and visual search (Casco and Prunetti, 1996; Vidyasagar  
44 and Pammer, 1999). Whether these deficits explain normal variation in reading skills  
45 is, however, not clear. At a more basic level, it is not clear whether visual  
46 representations of letters or strings themselves change with reading experience, and  
47 whether these changes predict reading fluency.

48 It is widely believed that learning to read leads to the formation of specialized  
49 detectors for letter combinations (Grainger and Whitney, 2004; Dehaene et al., 2005).  
50 Evidence in favour of this account comes from the greater activation of the word form  
51 regions to strings containing frequent bigrams. However, recent evidence has  
52 challenged this possibility by showing that discrimination between longer strings can  
53 be explained using single letters (Agrawal et al., 2019, 2020), and that fluent readers  
54 experience weaker interactions between letters in a bigram (Agrawal et al., 2019).  
55 However this association between bigram processing and reading fluency may be  
56 explained by other factors not tested in previous studies.

57

## 58 **Overview of this study**

59 Here, we investigated the relation between reading fluency and visual  
60 processing by testing two specific hypotheses. First, we asked whether learning to  
61 read results in the formation of specialized bigram detectors. Since reading involves  
62 extensive experience with upright letters, we hypothesized that learning to read would  
63 result in the formation of specialized detectors for upright bigrams but not inverted  
64 bigrams. This comparison avoids any confounds due to letter shape. To detect the  
65 presence of bigram detectors, we formulated a quantitative “letter sum” model to  
66 predict visual search on bigrams using the constituent single letters. Since bigram  
67 detectors, by definition, are activated by the entire bigram but not by the constituent

68 letters, their presence should lead to poor performance of the letter sum model. We  
69 therefore predicted that the presence of upright bigram detectors should lead to poor  
70 performance of the letter-sum model for upright but not inverted bigrams. Comparing  
71 upright and inverted bigrams also avoids any indirect confounds due to covarying  
72 cognitive factors. For instance, a correlation between visual search performance and  
73 reading fluency could simply be due to the requirement for visuospatial attention in  
74 both tasks (Franceschini et al., 2012).

75         Second, we hypothesized that reading fluency variations across children would  
76 be predicted by upright bigram processing during visual search, over and above the  
77 variation predicted by RAN tasks. This is a non-trivial outcome because it implies that  
78 changes in visual processing are independent of the perceptual-lexical processes  
79 captured by RAN, and that both influence reading fluency. Alternatively, it could be  
80 that bigram processing does not predict reading fluency variations any more than RAN  
81 measures, suggesting that changes in visual processing do not directly influence  
82 reading fluency.

83         To assess these possibilities, we tested children in grades 3-5 (7-11 years old)  
84 across two time points (separated by ~10 months). Each child was tested on two  
85 standardized measures of reading fluency (word and paragraph reading). To reduce  
86 testing time with children, we selected a RAN task over a phoneme awareness (PA)  
87 task because the former is a better predictor of reading in some alphabetic  
88 orthographies (Landerl et al., 2018; Vander Stappen and Reybroeck, 2018), and PA  
89 is prone to floor effects in India (the location of the present study) where literacy  
90 instruction privileges either the look-and-see method or the syllable units in a word  
91 (Nag, 2017). To measure visual processing, each child was tested on a visual search  
92 task involving both single letters as well as upright and inverted bigrams. We chose

93 visual search because it is a natural, intuitive task for children (they have to simply  
94 search for an odd-one-out), yet it has an objective measure (correctly identifying the  
95 target). At the same time, measures of search time in visual search can yield many  
96 insights into the underlying representations of visual features, including printed letters  
97 (Arun, 2012; Mohan and Arun, 2012; Pramod and Arun, 2016; Agrawal et al., 2019).

98

## RESULTS

99

100

101

102

103

104

105

106

107

108

109

110

Our goal was to investigate whether reading fluency can be linked to visual processing of bigrams. We selected children in grades 3-5 (aged 7-11 years) from a school where English is the medium of instruction, and tested them on English letters and words. Participants performed three tasks related to their reading skills: a word reading task (Figure 1A), a passage reading task (Figure 1B), and a rapid automatized naming (RAN) task (see Methods). As expected, the passage and word reading fluency scores were highly correlated with each other (Figure 1C). These children were further tested on a visual search task to characterize their visual processing (Figure 1D). In the visual search task, children were asked to identify an oddball target among multiple identical items.

### **Experiment 1: Single letter and bigram searches**

111

112

113

114

115

In Experiment 1, we tested 68 children from grades 3-5 (7-11 years old) on reading tasks as described above and a visual search task. In the visual search task, both the oddball and the distractors were either single letters, or upright bigrams or inverted bigrams, and were analysed separately.

116

### **Visual search for single letters**

117

118

119

120

121

122

We first analysed the performance of the participants on single letter searches. An example search involving single letters is shown in Figure 1D. Participants were highly accurate in their performance (average accuracy across 78 single letter searches, mean  $\pm$  std: 98%  $\pm$  2.4% across 68 children). They also made highly consistent responses, as evidenced by a strong and significant correlation between the average search times of odd and even-numbered participants (Figure 1E). We did

123 not observe any significant correlation between mean single letter search time and  
124 passage reading score ( $r = -0.2$ ,  $p = 0.1$ ).

125

## 126 **Visual search for upright vs inverted bigrams**

127 Next we sought to evaluate whether bigram processing is different for upright  
128 compared to inverted bigrams. Specifically, we reasoned that, if learning to read  
129 upright letters leads to the formation of upright bigram detectors, any model based on  
130 single letters would perform poorly on predicting upright but not inverted bigrams.

131 Participants performed oddball visual search in which both target and  
132 distractors were either upright or inverted bigrams (Figure 1D). As before, irrespective  
133 of fluency level, they were highly accurate in all conditions (average accuracy across  
134 115 bigram searches, mean  $\pm$  sem:  $95.8\% \pm 0.5\%$  for upright bigrams,  $95\% \pm 0.7\%$   
135 for inverted bigrams) and also highly consistent in their responses (Figure 1E).  
136 Interestingly, participants took longer to perform inverted searches (average response  
137 times, mean  $\pm$  sem across participants:  $1.96 \pm 0.03$  s for upright,  $2.43 \pm 0.05$  s for  
138 inverted;  $p < 0.00005$ , paired t-test across 115 searches). Thus, familiarity with the  
139 upright orientation improved discrimination. However, familiarity did not qualitatively  
140 alter visual search performance, as evidenced by a strong and significant correlation  
141 between search dissimilarities in the upright and inverted conditions ( $r = 0.92$  across  
142 115 bigram searches,  $p < 0.00005$ ).

143 As with single letter analysis, we correlated the mean search time with passage  
144 reading score. Interestingly, the association between reading fluency and visual  
145 search times was specific to upright but not inverted bigrams (correlation between  
146 passage reading score and mean bigram search time:  $r = -0.32$ ,  $p < 0.05$  for upright  
147 bigrams, and  $r = -0.15$ ,  $p = 0.24$  for inverted bigrams).



148

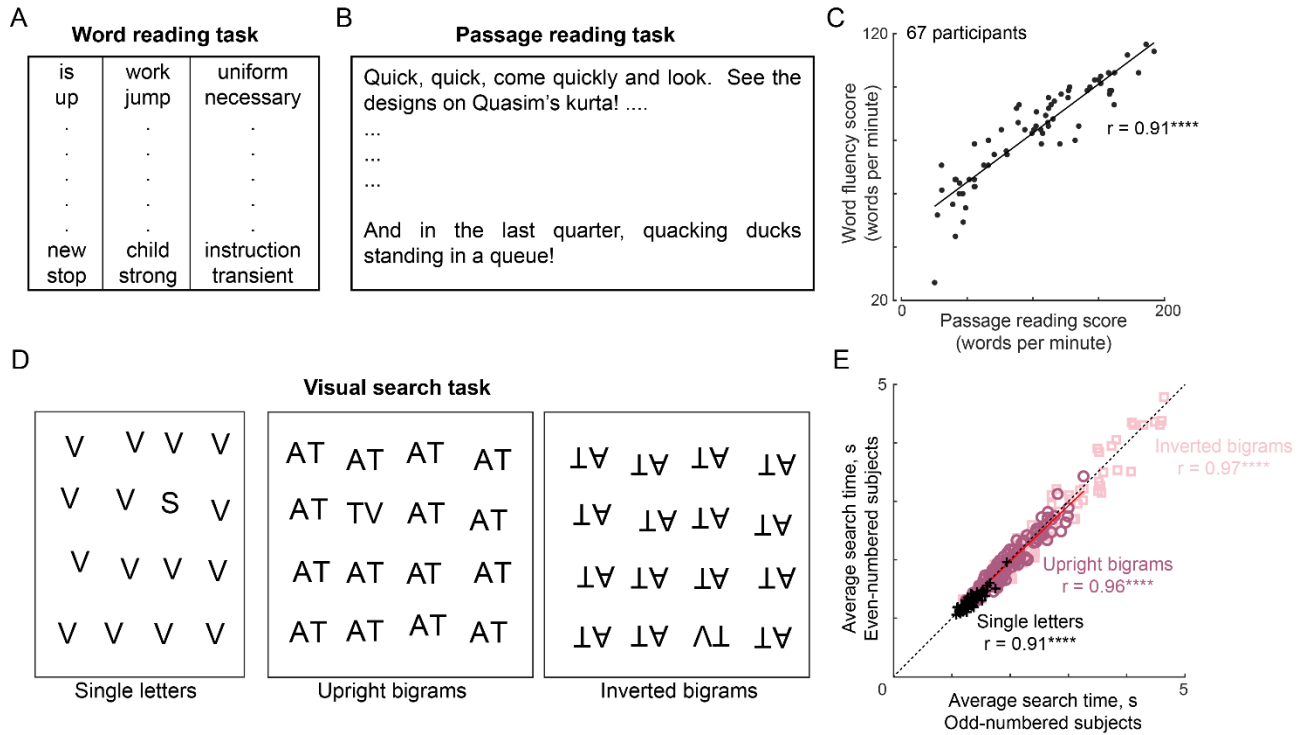

149

150

151

**Figure 1. Reading fluency and visual processing tasks (Experiment 1)**

152

(A) Example words from the standardized sight word efficiency task (TOWRE).

153

(B) The passage shown to the children to measure their reading fluency (see Methods).

154

155

(C) Correlation between the fluency scores obtained from word reading task (A), and passage reading task (B). Each point represent one subject ( $n = 67$ ) and asterisks indicate that the correlation is significant ( $^{****}$  is  $p < 0.00005$ ).

156

157

158

(D) Example single letter and bigram search array from the visual search task.

159

(E) Split-half consistency of the visual search data for letters (+), upright bigrams (o), and inverted bigrams (□), as estimated by the correlation between search time averaged across the odd-numbered subjects and even-numbered subjects.

160

161

162

163 **Can bigram search be explained using single letter relations?**

164 The above findings show that reading fluency is associated with upright bigram  
165 searches, but does not elucidate whether this is due to improved single letter  
166 representations or due to specialized bigram detectors. To investigate this issue, we  
167 devised a quantitative model to explain visual search for bigrams using the constituent  
168 single letters. In a series of previous studies, we have shown that the reciprocal of  
169 search time (1/RT) – which is a measure of dissimilarity – yields more accurate models  
170 for visual search, and that the dissimilarity between objects differing in multiple  
171 features can be explained using the constituent features.

172 In keeping with these findings, we devised a “letter-sum” model (Figure 2A) in  
173 which the search dissimilarity (1/RT) between a pair of bigrams, say AB & CD, is a  
174 linear sum of dissimilarities between the constituent pairs of single letters A, B, C, D  
175 i.e. (A,B), (A,C), (A,D), (B,C), (B,D), and (C,D). To account for possible differences in  
176 position, we grouped these pairs based upon the type of comparison: there were letter  
177 pairs at corresponding locations in the two bigrams (e.g. AC & BD), at opposite or  
178 across locations (e.g. AD & BC), and within a bigram (e.g. AB & CD). Thus, the search  
179 dissimilarity for bigrams AB & CD is given by:

180 
$$d(AB,CD) = C_{AC} + C_{BD} + X_{AD} + X_{BC} + W_{AB} + W_{CD} + c$$

181 where  $C_{AC}$  &  $C_{BD}$  are relations between letters in the two bigrams at  
182 corresponding locations,  $X_{AD}$  &  $X_{BC}$  are relations between letters in the two bigrams at  
183 opposite locations,  $W_{AB}$  &  $W_{CD}$  are letter relations within each bigram and  $c$  is a  
184 constant term. The part sum model works because the same terms repeat across  
185 searches: for instance, the term  $C_{AC}$  is also present in the equation for  $d(AE,CF)$ ,  
186  $d(AG,CH)$  etc. Since bigrams were constructed using six possible letters, the  
187 corresponding-location letter terms are  ${}^6C_2 = 15$  in number, and likewise there are 15

188 across-location letter terms and 15 within-bigram letter terms. These unknown part  
189 relations can then be estimated from the data using standard linear regression (see  
190 Methods).

191 The part-sum model yielded excellent fits to the observed bigram dissimilarities  
192 (model correlation:  $r = 0.92$  for upright bigrams,  $r = 0.94$  for inverted bigrams; Figure  
193 2B). Model correlations were close to the split-half consistency between participants,  
194 suggesting that the model explains nearly all the explainable variance in the bigram  
195 dissimilarities. Importantly, model fits were not systematically different between upright  
196 and inverted searches as would be expected if there were upright bigram detectors  
197 (Figure 2B). This in turn suggests that the better discrimination of upright bigrams by  
198 participants must be driven by letter-level differences in the part-sum model  
199 parameters.

200 We obtained several interesting insights upon a deeper investigation of the part-  
201 sum model parameters. First, the single letter relations estimated by the part-sum  
202 model for the corresponding, across and within terms were correlated with the  
203 observed single letter dissimilarities in this experiment ( $r = 0.76$ ,  $p < 0.005$ ;  $r = 0.84$ ,  $p$   
204  $< 0.0005$  &  $-0.61$ ,  $p < 0.05$  for C, X & W terms, for the part-sum model fit to the average  
205 dissimilarities for upright bigrams across all participants). Second, the within-bigram  
206 terms are consistently negative (Figure 2C), suggesting that search is harder when  
207 bigrams contain dissimilar letters. We have observed this effect consistently in  
208 previous studies – it resembles the well-known finding that search is harder when  
209 distractors are heterogeneous (Duncan and Humphreys, 1989; Vighneshvel and Arun,  
210 2013; Pramod and Arun, 2016). Third, the interaction between the letters (both across  
211 and within) were weaker for upright compared to inverted bigrams. This weaker

212 interaction leads to improved search for upright letters by increasing their  
213 discriminability.

214

### 215 **Relation between bigram searches and reading fluency**

216 The above findings that fluent readers are faster at discriminating upright  
217 bigrams might also be predicted by other covarying factors such as their RAN score,  
218 motor speed, overall executive function etc. To investigate these possibilities, we  
219 sought to predict the individual variation in reading fluency using a variety of possible  
220 factors. To avoid overfitting, we generated a predicted fluency score by training each  
221 factor on the word reading scores, and then compared this prediction with the passage  
222 reading score.

223 To characterize the effect of overall task performance for each subject, we  
224 included the motor speed (measured during a baseline motor block; see Methods) and  
225 overall accuracy (across all searches). To characterize any effects due to  
226 discrimination of single letters, we calculated the average dissimilarity across all single  
227 letter searches. To characterize the influence of upright bigrams, we fit a part-sum  
228 model to the upright bigram dissimilarities for each subject, and calculated the average  
229 of the corresponding, across and within terms separately, and included the constant  
230 term. We did likewise for the inverted bigram searches. Finally, we used the RAN  
231 score of each subject as a possible factor. For each factor we asked how well the  
232 predicted reading score using that factor matched the observed passage reading  
233 score.

234 The results of these analyses are summarized in Figure 2D. To establish an  
235 upper bound on model performance, we compared the word reading fluency and  
236 passage reading fluency scores, which were highly correlated ( $r = 0.91$ ,  $p < 0.0005$ ;

237 Figure 1C). Among all the individual factors, the RAN score had the highest correlation  
238 with passage reading fluency ( $r = 0.55$ ,  $p < 0.00005$ ; Figure 2D), followed by the upright  
239 bigram terms ( $r = 0.40$ ,  $p < 0.0005$ ; Figure 2D). This correlation was best for the part-  
240 sum model terms, compared to other measures derived from the bigram searches  
241 (correlation of passage reading scores with average upright bigram dissimilarity of  
242 each subject:  $r = 0.32$ ,  $p < 0.05$ ; with the average difference between upright and  
243 inverted bigram dissimilarity:  $r = 0.36$ ,  $p < 0.005$ ). Thus, the part-sum model  
244 parameters seem to capture the essential aspects of bigram processing.

245 The above analysis shows that a number of factors are correlated with passage  
246 reading fluency, but there could be correlations between these factors. To assess the  
247 unique contribution of each factor, we performed a partial correlation analysis.  
248 Specifically, we asked whether the correlation between a given factor with the passage  
249 reading fluency score would continue to be significant after regressing out all other  
250 factors. This revealed only two factors with a significant partial correlation: upright  
251 bigram terms and RAN score (Figure 2E). Hence, we conclude that RAN and upright  
252 bigram terms uniquely predict reading fluency compared to all other factors.

253

254

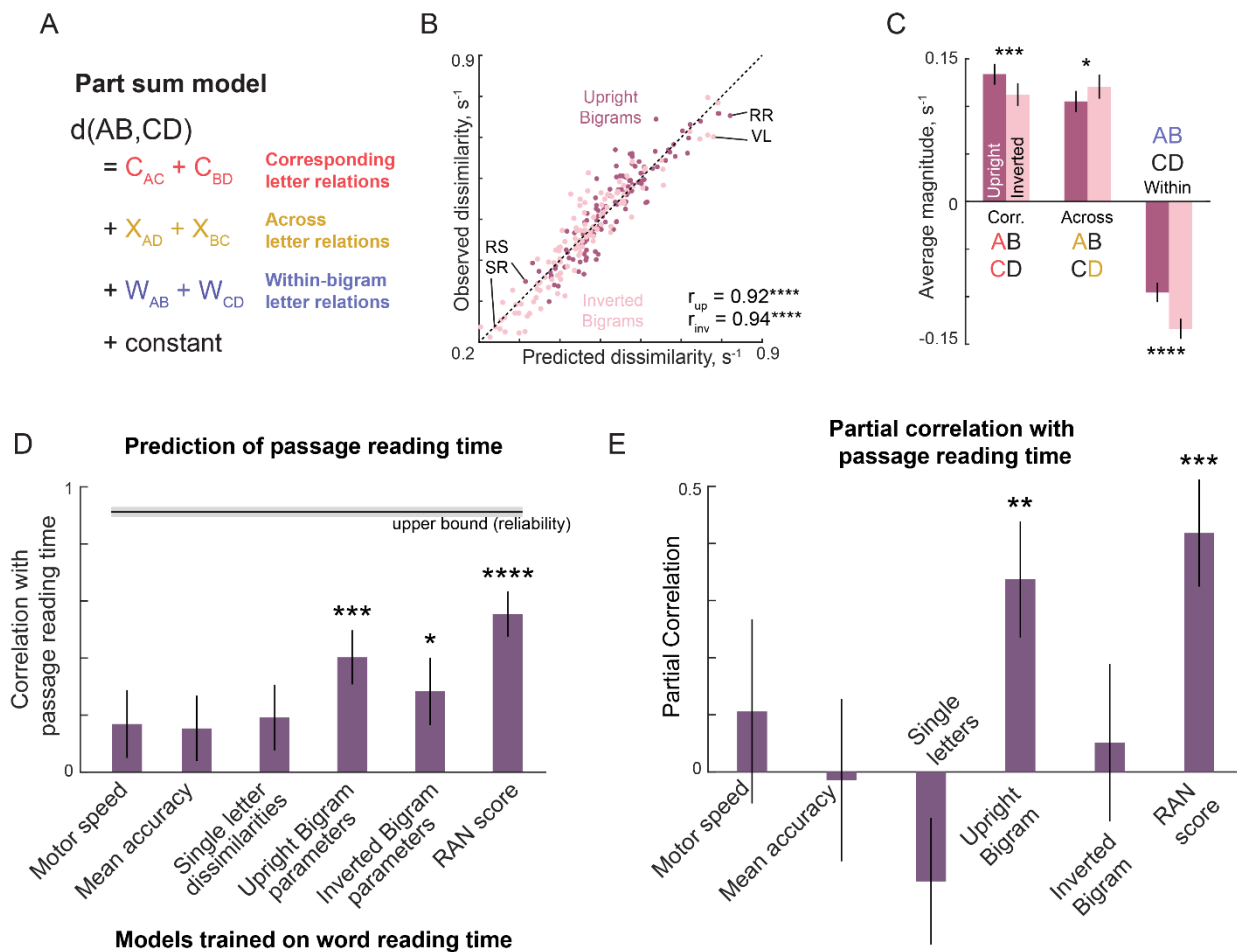

255

256

257

258

259

260

261

262

263

264

265

266

267

268

269

270

271

272

273

274

275

276

277

278

## Figure 2. Upright bigram processing predicts reading fluency (Experiment 1)

(A) Schematic of the letter-sum model, in which the net dissimilarity between two bigrams is a linear sum of single letter relations at corresponding locations across bigrams (C), opposite locations across bigrams (X) and within-bigrams (W).

(B) Observed bigram dissimilarity is plotted against predicted bigram dissimilarity from the part-sum model for both upright (*dark*) and inverted (*light*) bigram searches. Each point represents one search pair ( $n = 115$  each) and few example searches are highlighted. Asterisks indicate that the model predictions were significantly correlated with the observed dissimilarity values ( $p < 0.00005$ ).

(C) Average model coefficients (mean  $\pm$  sem) of each type for upright and inverted bigrams. Asterisks denote statistical significance obtained on a sign-rank test comparing 15 letter dissimilarities between upright and inverted conditions (\* is  $p < 0.05$ , \*\* is  $p < 0.005$ , etc).

(D) Model correlation of each factor in predicting passage reading score. Error bars indicate  $\pm 1$  s.d. using a bootstrap procedure (in which we repeatedly sampled 67 participants with replacement for a total of 1,000 times). All models were trained on word reading score, and tested on passage reading scores. Shaded error bars represent the noise ceiling i.e. correlation between word reading and passage reading score.

(E) Partial correlation of each factor with passage reading scores after regressing out all other factors. Asterisks denote significant correlation (\* is  $p < 0.05$ , \*\* is  $p < 0.005$ , and so on). Error bars represent  $\pm 1$  s.d. of the correlation coefficient, calculated as in (D).

## 279                   **EXPERIMENT 2: BIGRAM SEARCHES WITH VARYING SPACING**

280                   The above findings show that reading fluency is associated with upright but not  
281 inverted bigram processing, suggesting that familiarity with upright letter orientations  
282 leads to specific changes in visual processing. We therefore wondered whether this  
283 effect would also be specific to frequently encountered letter spacings. This is an  
284 important question by itself because changes in letter spacing affect reading speed  
285 (Zorzi et al., 2012; van den Boer and Hakvoort, 2015; Hakvoort et al., 2017). In  
286 addition, by testing the same participants after ~10 months, we also asked whether  
287 improvements in reading fluency can be predicted from changes in bigram processing.

288                   To this end, we recruited 65 children for Experiment 2, of whom 59 children had  
289 participated in Experiment 1 ~10 months earlier. Participants were again given the two  
290 reading tasks (word & passage reading), a RAN task, and a visual search task  
291 involving upright and inverted bigrams with normal or large spacing. All bigram  
292 searches were interleaved. An example bigram search array using normal letter  
293 spacing is shown in Figure 3A, and the same search with large spacing is shown in  
294 Figure 3B. It can be seen that the search with the large letter spacing is harder but this  
295 effect is weaker if the arrays are inverted. This was indeed true in general as well (see  
296 below).

297                   Overall, participants were highly accurate across all search types (accuracy,  
298 mean  $\pm$  sem: 96%  $\pm$  0.5% for upright-normal spacing, 95%  $\pm$  0.5% for upright-large  
299 spacing; 95%  $\pm$  0.6% for inverted-normal spacing, 94%  $\pm$  0.7% for inverted-large  
300 spacing). They were also highly consistent in their responses (split-half correlation  
301 between RT of odd- and even-numbered participants, for normal and large letter  
302 spacing:  $r = 0.96$  &  $0.95$  for upright bigrams,  $r = 0.96$  &  $0.97$  for inverted bigrams; all  
303  $p < 0.00005$ ).

304 Participants responded significantly slower for upright bigrams with large  
305 spacing (average response times, mean  $\pm$  sem across participants:  $1.8 \pm 0.03$  s for  
306 normal spacing,  $1.99 \pm 0.04$  s for large spacing;  $F(1, 8095) = 101.0$ ,  $p < 0.00005$  for  
307 main effect of spacing, ANOVA on RT with subject, spacing & image pair as factors;  
308  $F(35, 8095) = 56.69$ ,  $p < 0.00005$  for image-pair,  $F(35, 8095) = 4.05$ ,  $p < 0.00005$  for  
309 interaction effect; Figure 3C). This effect was present even for inverted bigrams  
310 (average response times, mean  $\pm$  sem across participants:  $2.06 \pm 0.05$  s for normal  
311 spacing,  $2.17 \pm 0.05$  s for large spacing,  $F(1, 8095) = 26.4$ ,  $p < 0.00005$  for main effect  
312 of spacing, ANOVA on RT with subject, spacing & image pair as factors;  $F(35, 8095)$   
313  $= 64.12$ ,  $p < 0.00005$  for image-pair,  $F(35, 8095) = 2.05$ ,  $p < 0.00005$  for interaction  
314 effect).

315 The normal spacing advantage was larger for upright compared to inverted  
316 bigrams (average difference in RT between normal and large spacing searches, mean  
317  $\pm$  sem across participants:  $0.19 \pm 0.02$  s for upright bigrams,  $0.11 \pm 0.02$  s for inverted  
318 bigrams,  $p < 0.05$  on a paired t-test across subject-wise differences). However, search  
319 dissimilarities were highly correlated with each other for both normal and large spacing  
320 searches ( $r = 0.94$  for upright bigrams,  $r = 0.95$  for inverted bigrams;  $p < 0.00005$ ), as  
321 well as between upright and inverted conditions ( $r = 0.95$  for normal spacing,  $r = 0.96$   
322 for large spacing;  $p < 0.00005$ ). Thus, bigram dissimilarities are qualitatively similar  
323 across letter spacing and bigram orientation.

324

### 325 **Can reading fluency be predicted by bigram processing at the familiar spacing?**

326 Next, we fit the part-sum model to the observed search dissimilarities for each  
327 subject for each of the four search types (upright/inverted x normal/large spacing). We  
328 then performed a similar analysis as before to determine whether the passage reading



329 score can be predicted by various factors. The correlation of each factor with passage  
330 reading score is shown in Figure 3D. Interestingly, only the part-sum model terms for  
331 upright bigrams with normal spacing predicted reading fluency, compared to model  
332 terms for large spacing and inverted bigram terms (Figure 3D). As before, this  
333 correlation was specific to the part-sum model terms, compared to other measures  
334 from the bigram searches: passage reading fluency was only weakly correlated with  
335 the average upright bigram dissimilarity of each subject ( $r = 0.17$  &  $0.11$  for small and  
336 large spacing,  $p = 0.19$  &  $0.37$  respectively) and with the average difference between  
337 upright and inverted bigram dissimilarity ( $r = 0.02$  &  $0.03$  for small and large spacing,  
338  $p = 0.89$  &  $0.84$  respectively). Thus the part-sum model captured some essential  
339 underlying aspect of bigram processing relevant to reading fluency.

340 To assess the unique contribution of each factor towards explaining reading  
341 fluency, we performed a partial correlation analysis as before. Only two factors showed  
342 a significant partial correlation with the passage reading score after regressing out all  
343 other factors: upright bigram terms for normal spacing and the RAN score (Figure 3E).  
344 Hence, we conclude that the effect of visual processing on reading fluency is highly  
345 specific both to the familiar (upright) orientation and familiar (normal) spacing.

346

347

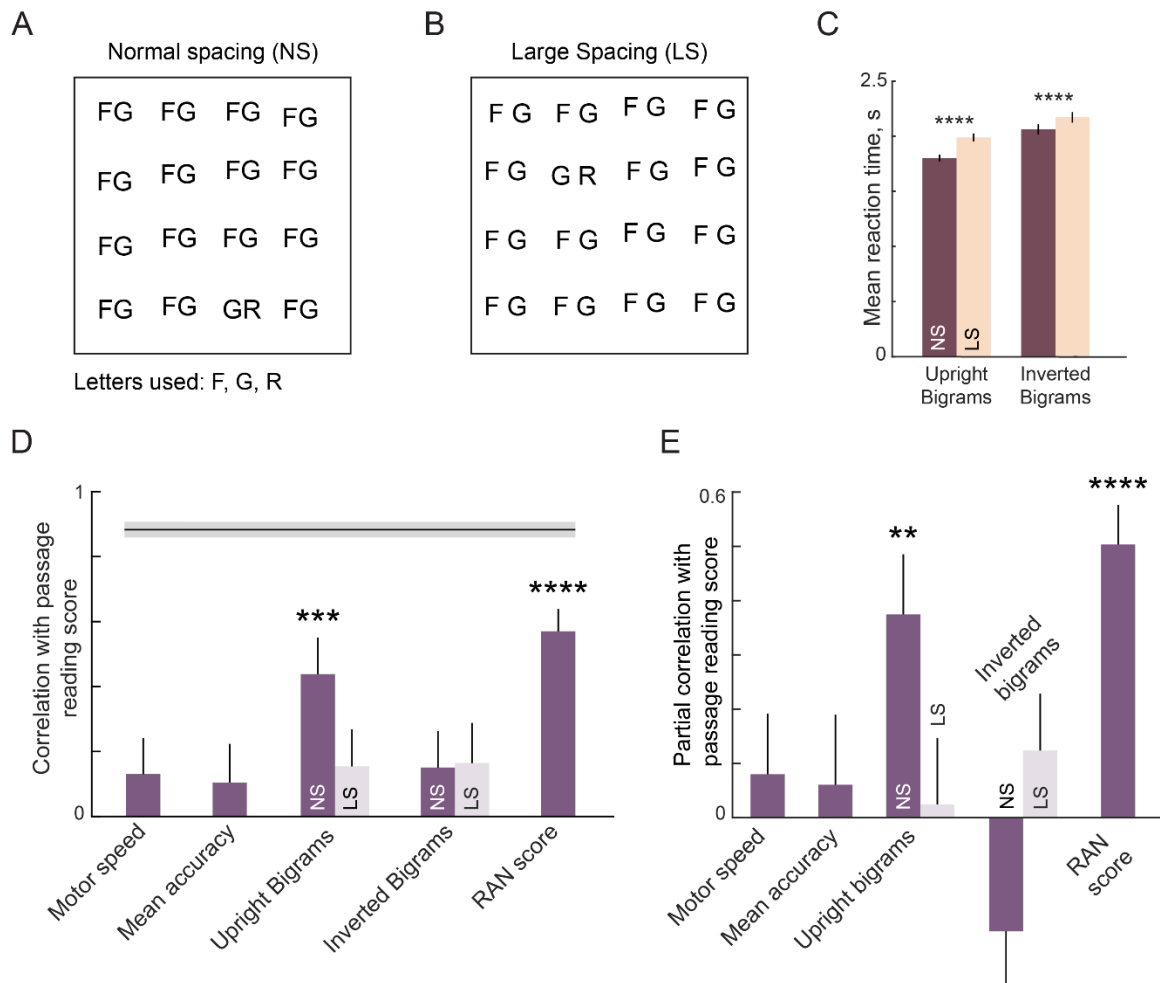

348  
349  
350  
351  
352  
353  
354  
355  
356  
357  
358  
359  
360  
361  
362  
363  
364  
365  
366  
367

**Figure 3. Effect of letter spacing on visual representation (Experiment 2)**

- (A) Example upright bigram search array with small letter spacing.
- (B) Same as (A) but with large letter spacing. It can be seen that this search is slightly harder than the search in (A).
- (C) Average search times in the oddball search task for upright and inverted bigrams with normal and large spacing. Error bars indicate s.e.m. across participants. Asterisks denote statistical significance of the difference in means (\*\*\*\* is  $p < 0.00005$ , ANOVA – see text).
- (D) Model correlation of each factor predicting passage reading score. Error bars indicate  $\pm 1$  s.d. using a bootstrap procedure, whereby we repeatedly sampled 67 participants with replacement for a total of 1,000 times. Shaded error bars on the top represents noise ceiling i.e. correlation between word reading and passage reading score.
- (E) Partial correlation of each factor with passage reading scores after regressing out all other factors. Asterisks denote significant correlation (\* is  $p < 0.05$ , \*\* is  $p < 0.005$ , and so on). Error bars represent  $\pm 1$  s.d. of the correlation coefficient, calculated as in (A).

368 **Can bigram processing changes predict longitudinal changes in fluency?**

369           Since the same participants were tested ~10 months apart in Experiments 1 &  
370 2, we wondered whether improvements in reading fluency can be predicted using  
371 changes in upright bigram processing. We first compared the reading and RAN scores  
372 across Experiments. As expected, all scores improved with time (Figure 4A). To  
373 assess whether the change in reading scores can be predicted using the change in  
374 bigram processing, we took the difference in the average model term magnitudes of  
375 each type (corresponding, across, within, and constant terms) and asked whether the  
376 change in fluency can be predicted using a linear sum of the change in the model  
377 parameters for upright or inverted bigrams. We found that upright bigram terms were  
378 able to predict the improvement in both word reading and passage reading ( $r = 0.42$ ,  
379  $p < 0.005$  for word reading,  $r = 0.29$ ,  $p < 0.05$  for passage reading; Figure 4B). By  
380 contrast, changes in inverted bigram processing predicted word reading only weakly  
381 ( $r = 0.30$ ,  $p < 0.05$ ; Figure 4B) but did not predict passage reading ( $r = 0.15$ ,  $p = 0.27$ ).  
382 Thus, only upright bigram processing changes robustly predicted fluency  
383 improvements.

384           We conclude that longitudinal changes in reading fluency can be predicted  
385 using changes in upright bigram processing.

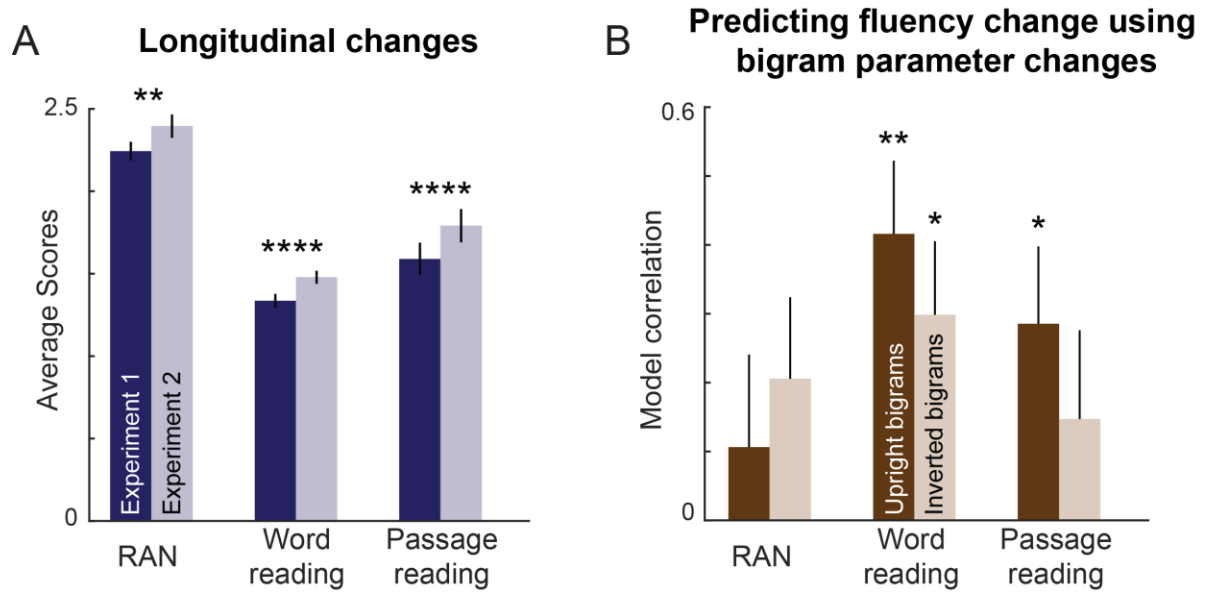

386

387

**Figure 4. Longitudinal prediction of reading fluency using upright bigrams.**

388

(A) Change in fluency scores across different fluency measures with reading expertise.

389

Asterisk represents statistical significance calculated using sign-rank test. Error bars represent s.e.m across participants.

390

391

(B) Correlation between change in fluency scores with change in visual representation

392

for upright (*dark*) and inverted (*light*) bigrams. Error bars represent indicate  $\pm 1$  s.d. obtained by a bootstrap procedure, whereby we repeatedly sampled 59

393

participants with replacement for a total of 1,000 times. Asterisks denote statistical significance of each correlation (\* is  $p < 0.05$ , \*\* is  $p < 0.005$ , and so on).

394

395

396

397

## DISCUSSION

398

399

400

401

402

403

Here we investigated whether reading fluency in children is associated with their performance on visual search tasks. Our main finding is that visual search for bigrams predicts reading fluency; this is only for upright (but not inverted) bigrams and with normal (but not large) spacing. This association predicted both cross-sectional inter-individual variations in reading fluency as well as longitudinal changes within individuals. Below we discuss these findings in relation to the existing literature.

404

405

406

407

408

409

410

411

412

413

414

415

416

417

418

419

420

We have found that reading fluency has a highly specific association with upright, normally spaced bigrams during visual search. This finding is consistent with crowding as well as serial position effects being different for letters compared to unfamiliar symbols (Grainger et al., 2010; Chanceaux and Grainger, 2012). It is also consistent with the processing deficits for letters but not symbols in dyslexic readers (Shovman and Ahissar, 2006). But the specificity of the association to bigrams in upright orientation with normal spacing is noteworthy, because such selective effects have not been reported previously. It suggests that visual representations for letters and bigrams undergo changes and these changes are specific to the orientation and spacing of text that is commonly encountered. It also indicates a possible resolution to conflicting evidence in the literature with regard to letter spacing. Some studies have found improved reading speed and accuracy with increased letter spacing (Zorzi et al., 2012; Hakvoort et al., 2017), whereas others have found that reading speed is optimal at the default spacing (Perea et al., 2011; van den Boer and Hakvoort, 2015). We speculate that these discrepancies could reflect differences in the statistics of letter characteristics (e.g., font, spacing, size) as experienced by sampled readers in different studies.

421 Our findings show an association between upright bigram processing and fluent  
422 reading, but do not reveal the direction of causality: does fluent reading lead to upright  
423 bigram processing, or does bigram processing lead to fluent reading? This question  
424 can be resolved if early changes in bigram processing were observed to precede  
425 changes in fluent reading, but this will require an extensive longitudinal study starting  
426 when literacy is emergent and while controlling for a number of other confounding  
427 factors. Nonetheless our findings do suggest a possible component in an intervention,  
428 whereby visual search activities involving upright bigrams or longer strings could  
429 facilitate optimal letter processing prior to the conversion of letters and letter strings  
430 into sounds and eventually words and their meaning.

431 Our results also reveal how visual representations change with reading. We  
432 have found that bigram discrimination in visual search can be explained entirely using  
433 dissimilarities between pairs of letters, for both upright and inverted bigrams. These  
434 results challenge the widely held view that reading should lead to the formation of  
435 specialized bigram detectors (Grainger and Whitney, 2004; Dehaene et al., 2005). If  
436 bigram detectors were formed through exposure to upright letters, upright bigram  
437 discrimination should have been less predictable from single letters compared to  
438 inverted bigram discrimination, but we observed no such trend (Figure 2B). Rather,  
439 we found that upright bigrams are more discriminable because of weaker within-  
440 bigram interactions (Figure 2C). We propose that reading not only makes single letters  
441 more discriminable but also makes letters more independent within a bigram, enabling  
442 the parallel processing of letters in a word.

443 We have found that RAN scores and upright bigram processing explained  
444 unique components of variance in reading fluency (Figure 2E, 3E). This is consistent  
445 with theoretical accounts of RAN that suggest it captures domain-general speed of

446 processing (Kail et al., 1999; Sideridis et al., 2016), domain specific speed of access  
447 to phonological codes and visual features (Stainthorp et al., 2010), cross-modal print  
448 processing (Nag and Snowling, 2012) and recognition of whole items (Lervåg and  
449 Hulme, 2009). However our results go further to show that there are bigram-level  
450 changes in visual processing that also seem to enable reading fluency that are not  
451 captured by the single letter or digit naming processes integral to RAN. We speculate  
452 that the upright bigram processing measured in our study captures key aspects of  
453 orthographic processing that can complement other measures (RAN, phoneme  
454 awareness, executive function tests) to track the development of typical or atypical  
455 reading skills (Norton and Wolf, 2012).

456

## METHODS

457 All children and their parents/guardians gave informed consent to an  
458 experimental protocol approved by the Institutional Human Ethics Committee of Indian  
459 Institute of Science, University of Oxford and The Promise Foundation. All participants  
460 were students of a school in Bengaluru where English is the medium of instruction. All  
461 participants had normal or corrected to normal vision.

462 In both Experiments 1 & 2, participants were asked to perform two reading tasks  
463 (word reading and passage reading), a RAN task and a visual search task. The sample  
464 sizes were chosen based on previous studies in the literature and this age range was  
465 chosen because at this age there is broad individual variation in reading fluency. The  
466 reading and naming tasks were identical in both experiments and are summarized  
467 below.

468

### 469 **Reading & RAN tasks (Experiments 1 & 2).**

470 *Word reading task.* This was the standardized sight word efficiency task (TOWRE). In  
471 this 104-word list, words increased in difficulty level, from simple words like “up” and  
472 “cat” to difficult words like “information” and “boisterous”. The word reading score was  
473 calculated as the number of words read correctly in the first 45 seconds, converted  
474 into a words/minute score.

475 *Passage reading task.* Participants were asked to read aloud a five line passage titled  
476 “Qasim’s kurta” describing the patterned dress of a stranger (Nag and Arulmani, 2015).  
477 The passage was edited to a word count of fifty. Participants were informed that they  
478 will have to answer two questions at the end of the passage and therefore had to read  
479 carefully. A discontinuation rule was applied after errors on eight words (an error rate  
480 of 15%). The passage reading score was calculated as the total number of words



481 read correctly divided by the time taken up to the point attempted, in units of  
482 words/minute.

483 *Rapid Automatized Naming (RAN)*. A set of 40 digits arranged in a 5 x 8 grid was  
484 shown to the subject, which they had to read aloud. The RAN score was calculated as  
485 40 divided by the time taken by participants to complete reading the digits.

486

### 487 **Experiment 1: Single letter and bigrams searches**

488 *Procedure*. Participants were seated comfortably in front of a laptop monitor placed  
489 ~60 cm away under the control of custom programs written in HTML/Javascript.

490

491 *Participants*. A total of 68 children (34 male, aged  $9.5 \pm 0.9$  years; 23 from 3<sup>rd</sup> grade,  
492 27 from 4<sup>th</sup> grade, 18 from 5<sup>th</sup> grade) were recruited for the study. One subject was  
493 excluded from the analyses due to the overall accuracy being less than 80%.

494

495 *Stimuli*: A total of 13 uppercase English letters (A, H, I, J, K, L, N, R, S, T, U, V, Y)  
496 were chosen for the single letter search task. These letters were chosen to contain  
497 similar and dissimilar letters. All letters were shown in the Arial Font with the exception  
498 of the letter 'l', for which horizontal bars were added at the top and bottom to improve  
499 its discriminability. The height of each letter was  $1^\circ$  in visual angle.

500 For the bigram task, 6 letters (A, L, R, S, T, and V) were combined in all possible  
501 manner (i.e. AA, AL, AR, AS, AT, AV, LA, LL, ... etc) to form 36 bigrams. These letters  
502 were chosen because they were not symmetric along the horizontal axis. Inverted  
503 bigrams were created by flipping the upright bigrams.

504

505 *Behavioural tasks.* To ensure familiarity with the buttons and measure their motor  
506 speed, participants first performed a baseline block prior to visual search. In this block,  
507 a white circle appeared on either side of a vertical red line dividing the screen (10  
508 trials) and participants responded its location using the same keys. The baseline block  
509 was followed by a practice block of visual search using unrelated objects (20 trials)  
510 and then followed by the main visual search block.

511 In the main visual search block, participants performed a total of 616 correct  
512 trials ( $^{13}C_2 = 78$  single letter searches + 115 upright bigram searches + 115 inverted  
513 bigram search and 2 repeats of each). We selected 115 searches out of 630 ( $^{36}C_2$ )  
514 possible searches to ensure a range of search difficulty. There were a total 15 pairs  
515 where first letter changes, 13 pairs where second letter changes, and 87 pairs with  
516 both letter changes. These 115 search pairs were fixed across all participants. All trials  
517 were interleaved, and incorrect/missed trials appeared randomly later in the task but  
518 were not analyzed.

519 The MATLAB function “isoutlier” was used to remove any data points that lie  
520 three scaled deviations away from the median. This was done to improve the split-half  
521 consistency of the data. We obtained qualitatively similar results without this step.

522

### 523 *Part-sum model to explain bigram dissimilarities using single letters*

524 For each of the 115 bigram searches, we calculated the average search time  
525 (averaged across repeats and participants) and converted this into search dissimilarity  
526 by taking the reciprocal (1/RT). This was done because previous work has shown that  
527 the reciprocal of search time yields better models of visual search compared to models  
528 based directly on RT (Arun, 2012; Pramod and Arun, 2014, 2016). According to the  
529 part-sum model, the net dissimilarity between two bigrams AB & CD is given by a sum

530 of pairwise letter relations between letters at corresponding and opposite locations  
531 across bigrams and within-bigram relations. Specifically,

$$532 \quad d(AB, CD) = C_{AC} + C_{BD} + X_{AD} + X_{BC} + W_{AB} + W_{CD} + \text{constant}$$

533 where  $C_{AC}$  &  $C_{BD}$  represent dissimilarity between letters at the corresponding  
534 locations of the two bigrams,  $X_{AD}$  &  $X_{BC}$  represent the dissimilarity between letters at  
535 opposite locations in the two bigrams, and  $W_{AB}$  &  $W_{CD}$  represent dissimilarity between  
536 letters within the two bigrams. This is a very general model because it allows for  
537 potentially different single letter dissimilarities of each type. It works because a given  
538 letter pair at each location can occur repeatedly across multiple bigram pairs (e.g.  
539 letter pair A-C is present at the corresponding locations of the pairs **AB-CD**, **AD-CD**,  
540 **BA-BC** etc.). Since bigrams were made from 6 possible letters, there are  ${}^6C_2$  (= 15)  
541 letter pairs for each of the corresponding, across, and within terms. This results in a  
542 46-parameter model (15 letter pairs/term x 3 terms + 1 constant). Since we have 115  
543 dissimilarities values and only 46 parameters, we can uniquely estimate all the  
544 parameters using linear regression. The resulting set of simultaneous equations can  
545 be represented as  $\mathbf{y} = \mathbf{Xb}$ , where  $\mathbf{y}$  is a 115x1 vector of observed dissimilarities,  $\mathbf{X}$  is  
546 a 115 x 46 matrix with entries of either 0, 1 or 2 depending on whether a particular pair  
547 is absent, present or repeated at each of the corresponding, across or within terms  
548 and  $\mathbf{b}$  is a 46 x 1 vector of unknown weights.

549 To compare model parameters for upright and inverted bigrams (Figure 2), we  
550 fit a single model for both upright and inverted bigrams together with separate C, X, W  
551 terms for each orientation but a single constant term. To predict fluency scores for  
552 each subject (Figures 2 & 3), we fit the part sum model to upright and inverted  
553 dissimilarities separately.

554

555 *Modelling fluency scores.*

556 For each subject, we estimated various factors from visual search experiment  
557 that could potentially predict reading fluency such as baseline reaction time, mean  
558 accuracy, mean single letter dissimilarities, part-sum model parameters estimated by  
559 modelling dissimilarities observed from upright and inverted bigram searches, and  
560 RAN score. To estimate the cross-validated fluency model fits, we trained each factor  
561 on word reading score and evaluated it against the passage reading score.

562 For each scalar factor, we fitted a linear model  $\mathbf{y} = \mathbf{X}\mathbf{b}$ . Here,  $\mathbf{y}$  is a 67x1 vector  
563 of observed word reading score,  $\mathbf{X}$  is a 67x2 matrix with entries containing one of the  
564 above mentioned factor along with a constant term,  $\mathbf{b}$  is a 2x1 vector of unknown  
565 weights that are estimated after solving the linear regression (*regress* function in  
566 MATLAB). Next, we calculated the predicted reading score using the estimated  
567 weights i.e.  $\hat{\mathbf{y}} = \mathbf{X}\mathbf{b}$  and correlated it with the passage reading score. The correlation  
568 coefficient quantifies the contribution of each factor in predicting reading fluency.

569 Since upright and inverted bigram factors contain multiple part-sum model  
570 parameters, we first averaged the estimated corresponding, across and within term  
571 interactions across all 15 letter pairs. This resulted in 4 parameters for each subject  
572 (including the constant term of the part-sum model). Next, we performed the same  
573 model fits as mentioned above to predict the fluency score as a linear combination of  
574 average model terms i.e.  $\mathbf{y} = \mathbf{X}\mathbf{b}$ . Here,  $\mathbf{y}$  is a 67x1 vector of observed word reading  
575 score,  $\mathbf{X}$  is a 67x5 matrix with entries containing the average model terms together  
576 with a constant term, and  $\mathbf{b}$  is a 5x1 vector of unknown weights.

577

578

579

580 *Partial correlation analyses.*

581 To estimate the unique contribution of each factor, we performed a partial  
582 correlation analysis. First, we took the predicted fluency score for each factor (as  
583 described above) and regressed out the net contribution of all the other factors.  
584 Specifically, we fit a linear model  $\mathbf{y} = \mathbf{Xb}$ , where  $\mathbf{y}$  is a 67x1 vector of fluency score  
585 predictions using that factor, and  $\mathbf{X}$  is a 67-row matrix containing all the other factors,  
586 and  $\mathbf{b}$  is a vector of unknown weights. We then calculated the residuals of this model  
587 i.e.  $(\mathbf{y} - \mathbf{Xb})$  which represent the predictions of that factor that are not explained by the  
588 other factors. Proceeding likewise, we regressed out the net contribution of all the  
589 factors from the passage fluency score. The partial correlation is the correlation  
590 between these two sets of residuals, and represents the correlation between reading  
591 fluency and a particular factor that remains even after removing the influence of all  
592 other confounding factors.

593

## 594 **Experiment 2: Effect of letter spacing**

595 All details of Experiment 2 were identical to those in Experiment 1 except those  
596 outlined below.

597 *Participants.* A total of 65 children (31 male, aged  $10.2 \pm 0.9$  years, 23 from 4<sup>th</sup> grade,  
598 26 from 5<sup>th</sup> grade and 16 from 6<sup>th</sup> grade) were recruited 10 months later for this follow-  
599 up experiment. Of these 59 children had previously participated in Experiment 1.

600 *Stimuli:* A total of 3 letters (F, G, and R) were combined in all possible ways (i.e. FF,  
601 FG, FR, GF, ... etc) to form a total of 9 bigrams. These letters were chosen because  
602 they were not symmetric along the horizontal axis. Letters were 1° in height, and were  
603 separated by either 0.18° (normal spacing) or 1.05° (large spacing). The normal  
604 spacing here approximates the spacing between letters in Arial font but with a fixed  
605 width between letters.

606 *Task:* Participants performed a total of 288 searches ( ${}^9C_2 = 36$  bigrams x normal and  
607 large letter spacing x 2 configurations x 2 repeats).

608 *Part-sum model.* Since there are only  ${}^3C_2 = 3$  letter relations each for the  
609 corresponding, across and within term, the part-sum model had only 10 free  
610 parameters, which were estimated from a total of 36 bigram dissimilarities.

611

## 612 **Longitudinal analysis**

613 To this end, we analysed the data from 59 participants common to both  
614 Experiments 1 & 2. To predict the change in fluency score using the change in the  
615 average part-sum model parameters (averaged across  ${}^3C_2 = 3$  terms for  
616 corresponding, across, within terms, together with the constant term), we performed a  
617 linear regression to predict the change in fluency as a weighted sum of the part-sum  
618 model parameters. Specifically, we fitted a linear model  $\mathbf{y} = \mathbf{X}\mathbf{b}$ , where  $\mathbf{y}$  is a 59x1  
619 vector depicting difference in fluency score (i.e. Experiment 2 – Experiment 1 scores),  
620  $\mathbf{X}$  is a 59 x 5 matrix with rows containing the difference between each type of model  
621 term together with a global constant term, and  $\mathbf{b}$  is a 5x1 vector of unknown weights  
622 that is estimated using standard linear regression (*regress* function in MATLAB).

623

## REFERENCES

- 624  
625 Agrawal A, Hari K, Arun SP (2020) A compositional neural code in high-level visual  
626 cortex can explain jumbled word reading. *Elife* 9:e54846.
- 627 Agrawal A, Hari KVS, Arun SP (2019) Reading Increases the Compositionality of  
628 Visual Word Representations. *Psychol Sci* 30:1707–1723.
- 629 Arun SP (2012) Turning visual search time on its head. *Vision Res* 74:86–92.
- 630 Bosse M-L, Tainturier MJ, Valdois S (2007) Developmental dyslexia: the visual  
631 attention span deficit hypothesis. *Cognition* 104:198–230.
- 632 Bouma H, Legein CP (1977) Foveal and parafoveal recognition of letters and words  
633 by dyslexics and by average readers. *Neuropsychologia* 15:69–80.
- 634 Casco C, Prunetti E (1996) Visual search of good and poor readers: effects with  
635 targets having single and combined features. *Percept Mot Skills* 82:1155–1167.
- 636 Chanceaux M, Grainger J (2012) Serial position effects in the identification of letters,  
637 digits, symbols, and shapes in peripheral vision. *Acta Psychol (Amst)* 141:149–  
638 158.
- 639 Dehaene S, Cohen L, Sigman M, Vinckier F (2005) The neural code for written  
640 words: a proposal. *Trends Cogn Sci* 9:335–341.
- 641 Duncan J, Humphreys GW (1989) Visual search and stimulus similarity. *Psychol Rev*  
642 96:433–458.
- 643 Franceschini S, Gori S, Ruffino M, Pedrolli K, Facchetti A (2012) A Causal Link  
644 between Visual Spatial Attention and Reading Acquisition. *Curr Biol* 22:814–  
645 819.
- 646 Goswami U (2015) Sensory theories of developmental dyslexia: three challenges for  
647 research. *Nat Rev Neurosci* 16:43–54.
- 648 Grainger J, Tydgate I, Isselé J (2010) Crowding affects letters and symbols differently.  
649 *J Exp Psychol Hum Percept Perform* 36:673–688.
- 650 Grainger J, Whitney C (2004) Does the human mind read words as a whole? *Trends*  
651 *Cogn Sci* 8:58–59.
- 652 Hakvoort B, van den Boer M, Leenaars T, Bos P, Tijms J (2017) Improvements in  
653 reading accuracy as a result of increased interletter spacing are not specific to  
654 children with dyslexia. *J Exp Child Psychol* 164:101–116.
- 655 Kail R, Hall LK, Caskey BJ (1999) Processing speed, exposure to print, and naming  
656 speed. *Appl Psycholinguist* 20:303–314.
- 657 Landerl K, Freudenthaler HH, Heene M, De Jong PF, Desrochers A, Manolitsis G,  
658 Parrila R, Georgiou GK (2018) Phonological Awareness and Rapid Automated  
659 Naming as Longitudinal Predictors of Reading in Five Alphabetic Orthographies  
660 with Varying Degrees of Consistency. *Sci Stud Read* 00:1–15.
- 661 Lervåg A, Hulme C (2009) Rapid Automated Naming (RAN) taps a mechanism that  
662 places constraints on the development of early reading fluency. *Psychol Sci*  
663 20:1040–1048.
- 664 Martelli M, Di Filippo G, Spinelli D, Zoccolotti P (2009) Crowding, reading, and  
665 developmental dyslexia. *J Vis* 9:14.1-18.
- 666 Melby-Lervåg M, Lyster S-AH, Hulme C (2012) Phonological skills and their role in  
667 learning to read: a meta-analytic review. *Psychol Bull* 138:322–352.
- 668 Mohan K, Arun SP (2012) Similarity relations in visual search predict rapid visual  
669 categorization. *J Vis* 12:19–19.
- 670 Nag S (2017) Learning to read alphasyllabaries. In: *Theories of Reading*  
671 *Development* (Cain K, Compton DL, R.K. P, eds), pp 75–98. John Benjamins  
672 Publishing Company.
- 673 Nag S, Arulmani G (2015) *Books for Embedded Phonics*. The Promise Foundation.



- 674 Nag S, Snowling MJ (2012) Reading in an Alphasyllabary: Implications for a  
675 Language Universal Theory of Learning to Read. *Sci Stud Read* 16:404–423.
- 676 Norton ES, Wolf M (2012) Rapid automatized naming (RAN) and reading fluency:  
677 implications for understanding and treatment of reading disabilities. *Annu Rev*  
678 *Psychol* 63:427–452.
- 679 Parrila R, Kirby JR, McQuarrie L (2004) Articulation rate, naming speed, verbal  
680 short-term memory, and phonological awareness: Longitudinal predictors of  
681 early reading development? *Sci Stud Read* 8:3–26.
- 682 Perea M, Moret-Tatay C, Gómez P (2011) The effects of interletter spacing in visual-  
683 word recognition. *Acta Psychol (Amst)* 137:345–351.
- 684 Pramod RT, Arun SP (2014) Features in visual search combine linearly. *J Vis* 14:1–  
685 20.
- 686 Pramod RT, Arun SP (2016) Object attributes combine additively in visual search. *J*  
687 *Vis* 16:8.
- 688 Rima S, Kerbyson G, Jones E, Schmid MC (2020) Advantage of detecting visual  
689 events in the right hemifield is affected by reading skill. *Vision Res* 169:41–48.
- 690 Shovman MM, Ahissar M (2006) Isolating the impact of visual perception on  
691 dyslexics' reading ability. *Vision Res* 46:3514–3525.
- 692 Sideridis GD, Simos P, Mouzaki A, Stamovlasis D (2016) Efficient word reading:  
693 Automaticity of print-related skills indexed by rapid automatized naming through  
694 cusp-catastrophe modeling. *Sci Stud Read* 20:6–19.
- 695 Simpson IC, Mousikou P, Montoya JM, Defior S (2013) A letter visual-similarity  
696 matrix for Latin-based alphabets. *Behav Res Methods* 45:431–439.
- 697 Stainthorp R, Stuart M, Powell D, Quinlan P, Garwood H (2010) Visual Processing  
698 Deficits in Children With Slow RAN Performance. *Sci Stud Read* 14:266–292.
- 699 van den Boer M, Hakvoort BE (2015) Default spacing is the optimal spacing for word  
700 reading. *Q J Exp Psychol (Hove)* 68:697–709.
- 701 Vander Stappen C, Reybroeck M Van (2018) Phonological Awareness and Rapid  
702 Automatized Naming Are Independent Phonological Competencies With  
703 Specific Impacts on Word Reading and Spelling: An Intervention Study. *Front*  
704 *Psychol* 9:320.
- 705 Vidyasagar TR, Pammer K (1999) Impaired visual search in dyslexia relates to the  
706 role of the magnocellular pathway in attention. *Neuroreport* 10:1283–1287.
- 707 Vighneshvel T, Arun SP (2013) Does linear separability really matter? Complex  
708 visual search is explained by simple search. *J Vis* 13:1–24.
- 709 Zorzi M, Barbiero C, Facoetti A, Lonciari I, Carrozzi M, Montico M, Bravar L, George  
710 F, Pech-Georgel C, Ziegler JC (2012) Extra-large letter spacing improves  
711 reading in dyslexia. *Proc Natl Acad Sci U S A* 109:11455–11459.

712

## 713 **ACKNOWLEDGEMENTS**

714 We are grateful to the children, their guardians and the staff at the Sandeepani  
715 Academy for Excellence for their participation, and to Laxmi Sutar, Sandra Beula,  
716 Pooja Shah, B. Kala and Sanjana Nagendra from The Promise Foundation for  
717 assistance with data collection. This work was supported by a Senior Fellowship  
718 (IA/S/17/1/503081) from the Wellcome Trust-DBT India Alliance to SPA, and the  
719 2018 Trinity Term Department of Education Small Research Grant to SN.

720

## 721 **AUTHOR CONTRIBUTIONS**

722 All authors contributed to the overall study design. AA, SPA & SN designed  
723 experiments, AA implemented the experiment and collected data, AA & SPA



724 analyzed and interpreted data with inputs from KVSH & SN, and AA and SPA wrote  
725 the manuscript with inputs from KVSH & SN.  
726
